# Supplementary material for: The heterogeneity of youth at risk of diabetes and prediabetes: a latent class analysis of a national sample
Source: bioRxiv or medRxiv preprint supplement (doi:10.1101/2024.11.20.24317640), 2024-11-23
Supplement: Supplementary file [file media-1.pdf]

# Supplementary Materials for

## The heterogeneity of youth at risk of diabetes and prediabetes: a latent class analysis of a national sample

Catherine McDonough, Yan Chak Li, Gaurav Pandey, Nita Vangeepuram, Bian Liu\*

\*Corresponding author | Email: [bian.liu@mountsinai.org](mailto:bian.liu@mountsinai.org)

### The PDF file includes:

Figure S1: Patient selection flow chart

Figure S2: Bootstrap class selection by AIC

Figure S3: Bolck, Croon, and Hagenaars method latent class probabilities

Table S1: Raw NHANES variables and corresponding cycles used to build physical activity composite variable

**Figure S1. Patient selection criteria**

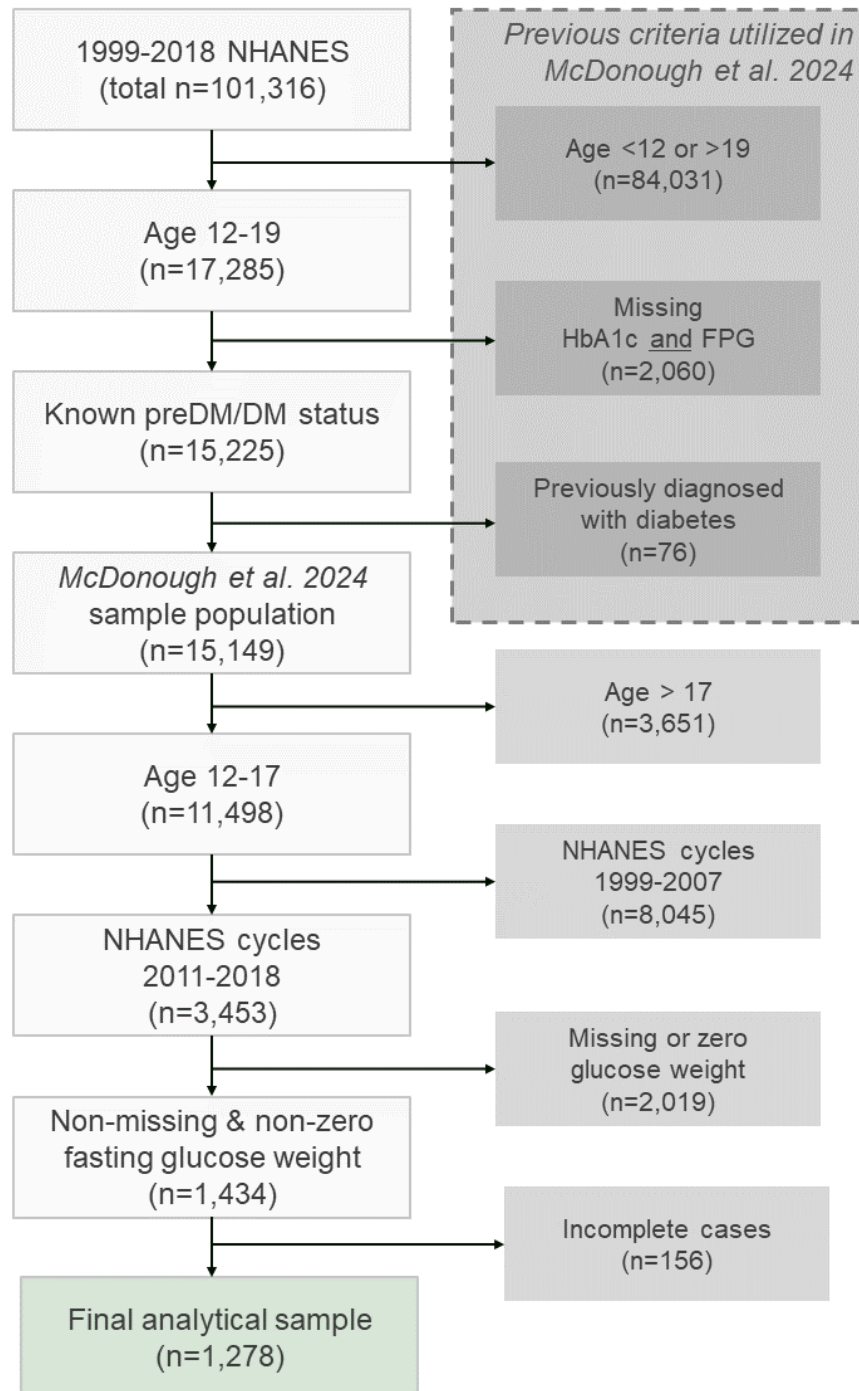

**Figure S2. Bootstrap indicating four classes as optimal solution for the latent class analysis**

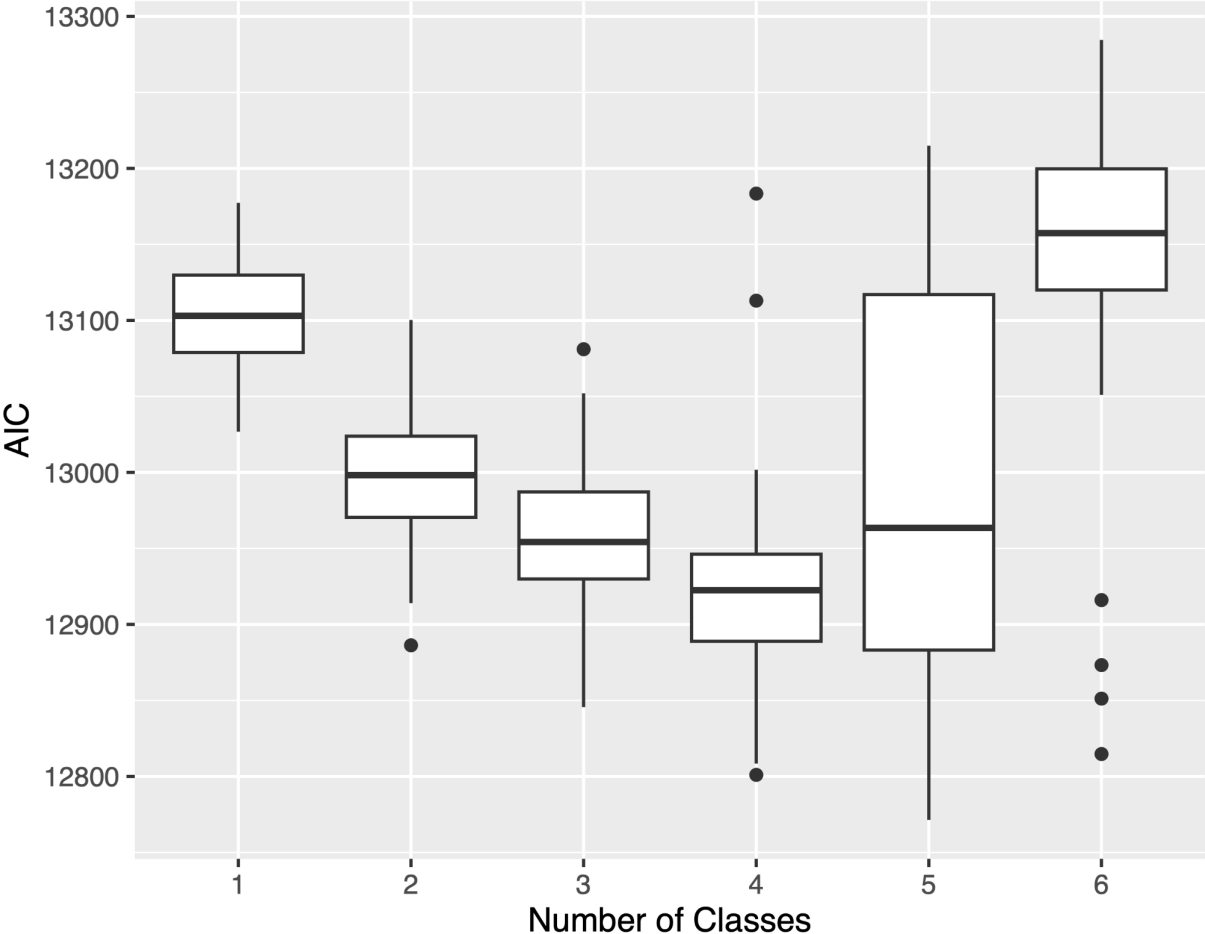

**Figure S3. Class-specific probabilities of BMI and lifestyle behavior categories across four latent classes identified based on a 3-step approach based on methods by the Bolck, Croon, and Hagenaars (BCH).**

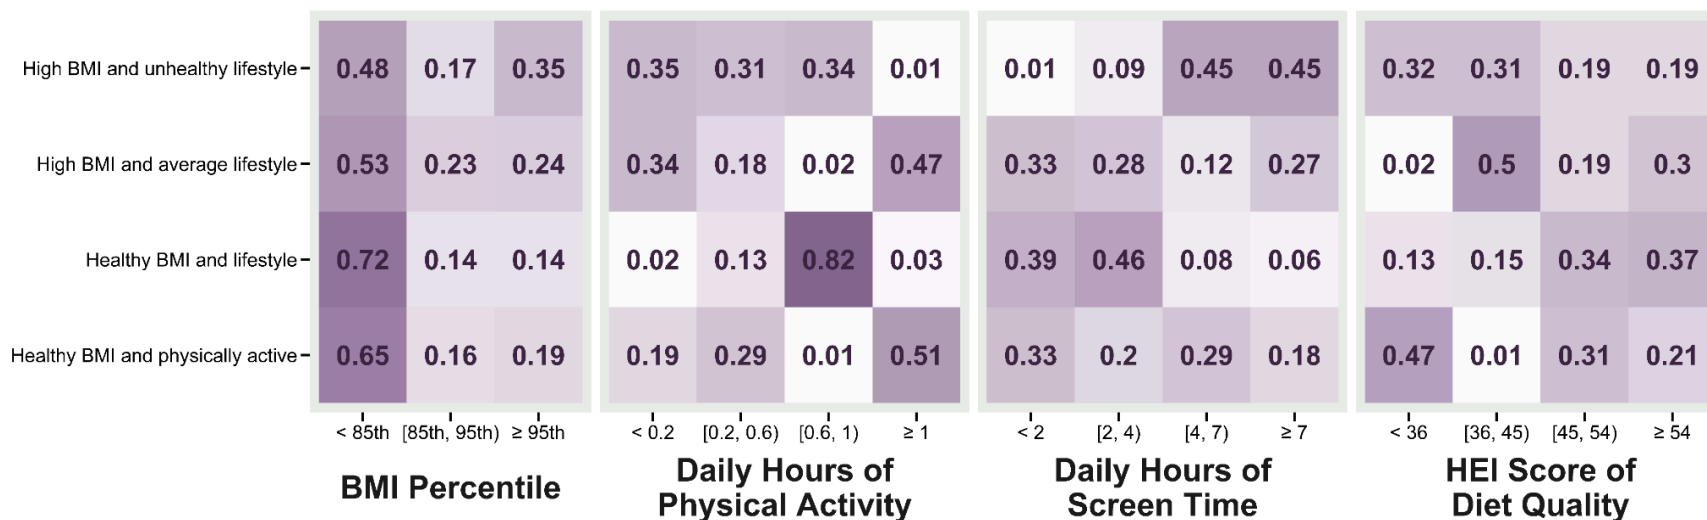

**Note:** We used an established SAS macro to implement the 3-step BCH-approach to identify latent classes and investigate the association between preDM/DM risk and the class membership. This 3-step approach differed from the main LCA analysis, which is a one-step approach where the coefficients on the covariates are estimated simultaneously (48). as part of the latent class model. The BCH-approach included the following 3 steps: 1) identify the latent class without the covariates; 2) compute a special weighting variable using the posterior probabilities of class membership based on the LCA model; and 3) estimating multinomial logistic regression coefficients for predicting membership in each class with incorporation of the weighting variable from step-2. We tested the LCA model with 2 to 8 classes, and chose four classes as the optimal number of latent classes based on the minimum AIC associated with the 4-class solution. The four classes were similar to those identified in the main LCA model using the one-step approach, as shown in the class-specific probabilities (Figure S2). In the multinomial logistic regression, class membership was the outcome variable, where we chose the “High BMI and unhealthy lifestyle” as the reference class, and preDM/DM status was the exposure variable. The model additionally adjusted for age, sex, family PIR, insurance, as in the main model. NHANES survey weight was incorporated in the 3-step approach, but not clustering.

**Table S1. Raw NHANES variables and corresponding cycles used to build physical activity composite variable**

| Cycle     | Intensity | Frequency                                                                  | Duration                                                         | Physical activity (PA) minutes per week                     | Physical activity (PA) hours per day                                                                                                            |
|-----------|-----------|----------------------------------------------------------------------------|------------------------------------------------------------------|-------------------------------------------------------------|-------------------------------------------------------------------------------------------------------------------------------------------------|
| 2007-2016 | Moderate  | <b>PAQ670</b><br>Days moderate recreational activities ( <i>per week</i> ) | <b>PAD675</b><br><i>Minutes</i> moderate recreational activities | <i>Moderate PA min per week</i> =<br>$PAQ670 \times PAD675$ | <i>PA hours per day</i> =<br>$\frac{(\text{Moderate PA min per wk} + \text{Vigorous PA min per wk})}{7 \text{ days} \times 60 \text{ minutes}}$ |
|           | Vigorous  | <b>PAQ655</b><br>Days vigorous recreational activities ( <i>per week</i> ) | <b>PAD660</b><br><i>Minutes</i> vigorous recreational activities | <i>Vigorous PA min per week</i> =<br>$PAQ670 \times PAD675$ |                                                                                                                                                 |
| 2017-2018 | NA        | <b>PAQ706</b><br>Days physically active at least 60 min.                   | 60 minutes                                                       |                                                             | <i>PA hours per day</i> * =<br>$\frac{PAQ706}{7 \text{ days}}$                                                                                  |

\* Based on the assumption that each day reported in PAQ706 is 60 minutes of physical activity.
